# Supplementary material for: Two new 3D metal–organic frameworks of nanoscale cages constructed by Cd(ii) and conformationally-flexible cyclohexanehexacarboxylate
Source: Royal Society of Chemistry journal article supplement (doi:10.1039/b604584g), 2006-01-01
Supplement: b604584g.pdf [file b604584g.pdf]

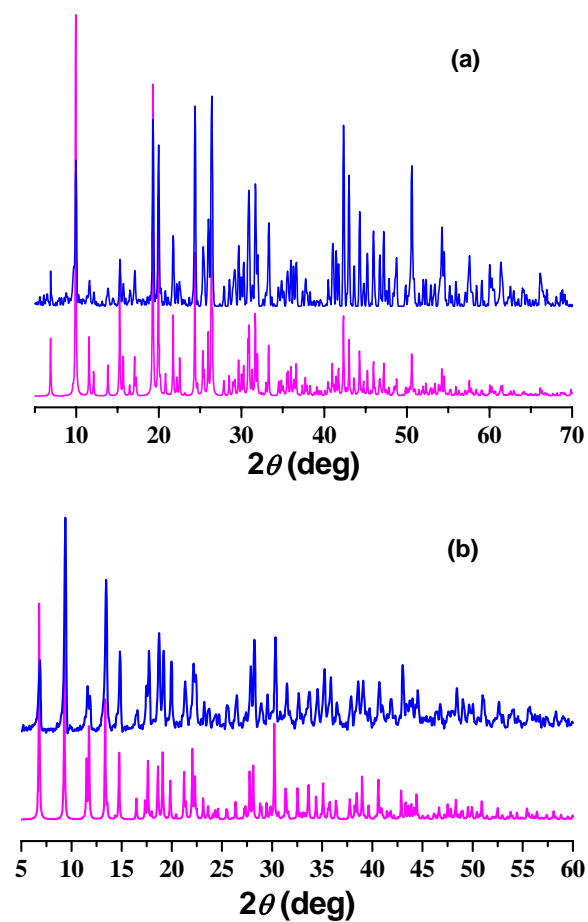

**Fig. S1** Observed (blue) and calculated (purple) powder X-ray diffraction patterns for **1** (a) and **2** (b).

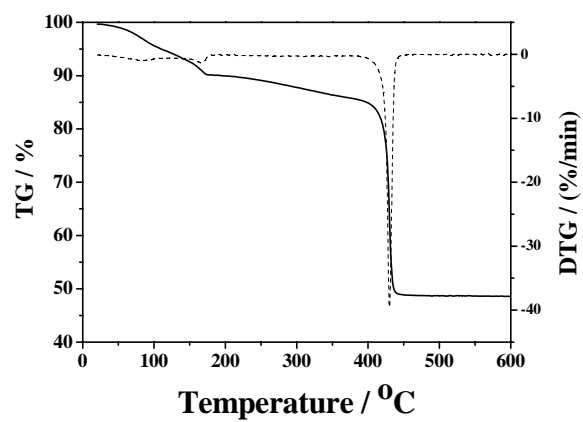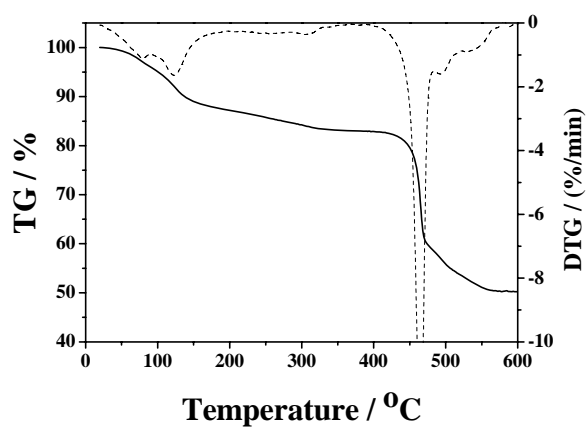

Fig. S2 TG-DTG analyses of **1** (a) and **2** (b).

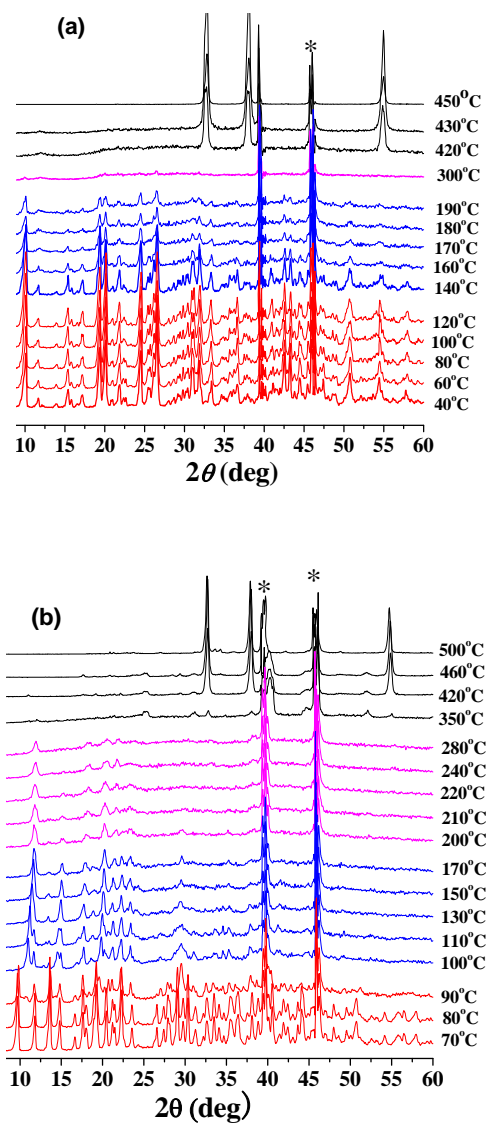

**Fig. S3** Variable-temperature XRPD patterns for **1(a)** and **2 (b)** (\*The diffraction peaks of Pt disk).
